# Supplementary material
Source: PubMed Central journal article supplement (PMC10236056)
Supplement: 11032_2021_1215_MOESM6_ESM.pdf [file 11032_2021_1215_MOESM6_ESM.pdf]

**Table S2** Linkage between *ms10<sup>35</sup>* and *f3h* in the T2 and T3 generation.

| Generation | Green stem type |                | No. of green stem plants | No. of purple stem plants |
|------------|-----------------|----------------|--------------------------|---------------------------|
|            | Male sterile    | Male fertility |                          |                           |
| T2         | 22 (84.62%)     | 4 (15.38%)     | 26                       | 80                        |
| T3         | 32 (91.43%)     | 3 (8.57%)      | 35                       | 39                        |

T2 plants were derived from the selfed progeny of T1 generation *Ms10<sup>35</sup>ms10<sup>35</sup>/F3Hf3h*; T3 plants were obtained from the crossed progeny of *CR-ms10<sup>35</sup>/f3h* and *Ms10<sup>35</sup>ms10<sup>35</sup>/F3Hf3h*.
